# Supplementary material for: Fabrication of bimetallic Cu/Au nanotubes and their sensitive, selective, reproducible and reusable electrochemical sensing of glucose
Source: Royal Society of Chemistry journal article supplement (doi:10.1039/c5nr02399h), 2015-01-01
Supplement: c5nr02399h1.pdf [file c5nr02399h1.pdf]

## Supplementary Information

### **Fabrication of Bimetallic Cu/Au Nanotubes and Their Sensitive, Selective, Reproducible and Reusable Electrochemical Sensing of Glucose**

Si Yin Tee,<sup>a,b</sup> Enyi Ye,<sup>a</sup> Pei Hua Pan,<sup>c</sup> Coryl Jing Jun Lee,<sup>a</sup> Hui Kim Hui,<sup>a</sup> Shuang-Yuan Zhang,<sup>a</sup> Leng Duei Koh,<sup>a,b</sup> Zhili Dong<sup>c</sup> and Ming-Yong Han<sup>a,b\*</sup>

<sup>a</sup>Institute of Materials Research and Engineering, Agency for Science, Technology & Research, 3 Research Link, Singapore 117602. Email: [my-han@imre.a-star.edu.sg](mailto:my-han@imre.a-star.edu.sg)

<sup>b</sup>Department of Biomedical Engineering, National University of Singapore, 9 Engineering Drive, Singapore 117576.

<sup>c</sup>School of Material Science and Engineering, Nanyang Technological University, Singapore 639798.

E-mail: [my-han@imre.a-star.edu.sg](mailto:my-han@imre.a-star.edu.sg)

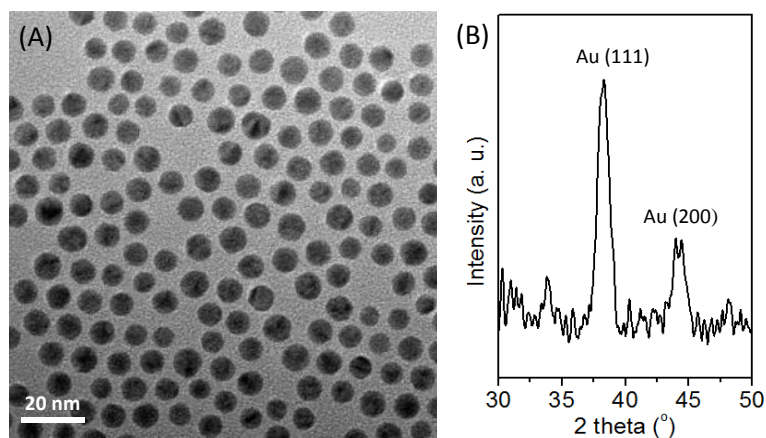

**Fig. S1** (A) TEM image of uniform gold nanoparticles prepared by reacting 0.1 mmol of  $\text{AuBr}_3$  in oleylamine at 140 °C for 30 min. (B) XRD pattern of the spherical gold nanoparticles with fcc structure (JCPDS #04-0784).

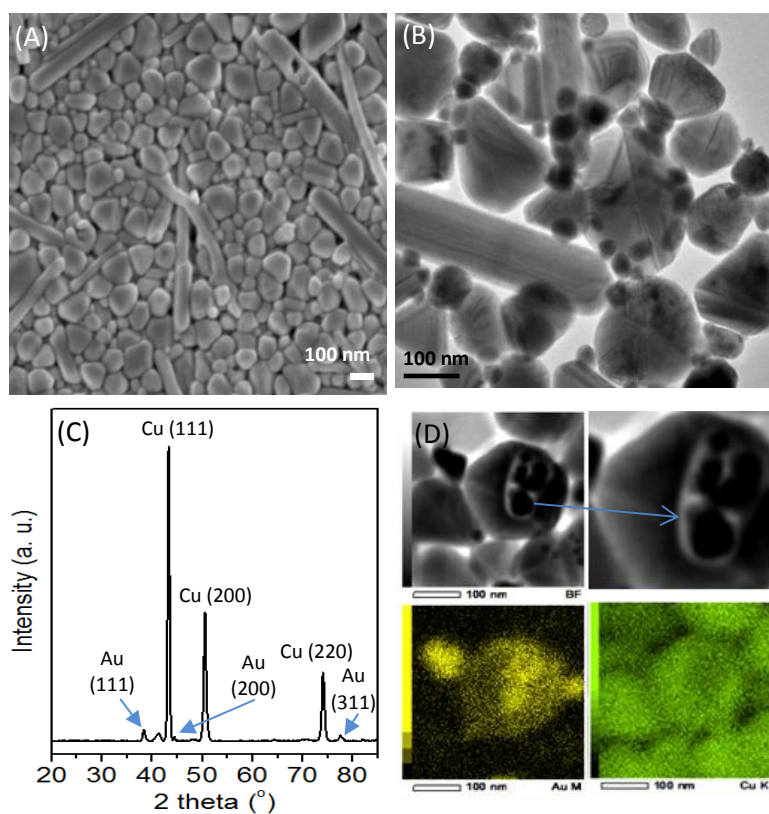

**Fig. S2** (A) SEM image, (B) TEM image, (C) XRD pattern and (D) TEM EDX mapping of Cu/Au nanostructures prepared by heating the as-prepared copper nanowires at 220 °C after injecting a low amount of  $\text{Au}^{3+}$  in the solution.

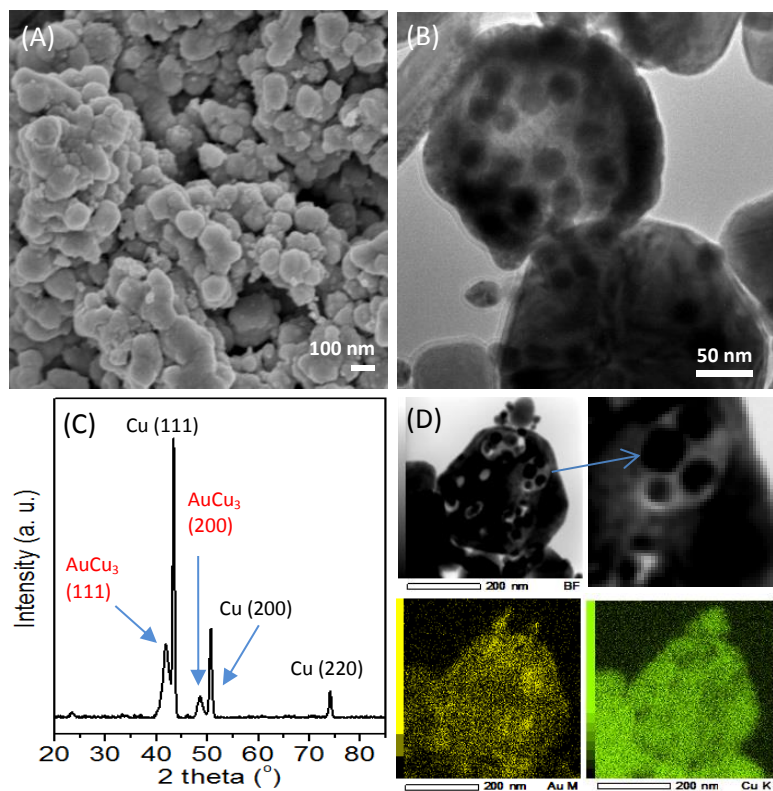

**Fig. S3** (A) SEM image, (B) high resolution TEM image, (C) XRD pattern and (D) TEM EDX mapping of Cu/Au nanostructures prepared by heating the as-prepared copper nanowires at 300 °C after injecting a low amount of  $\text{Au}^{3+}$  at 220 °C.

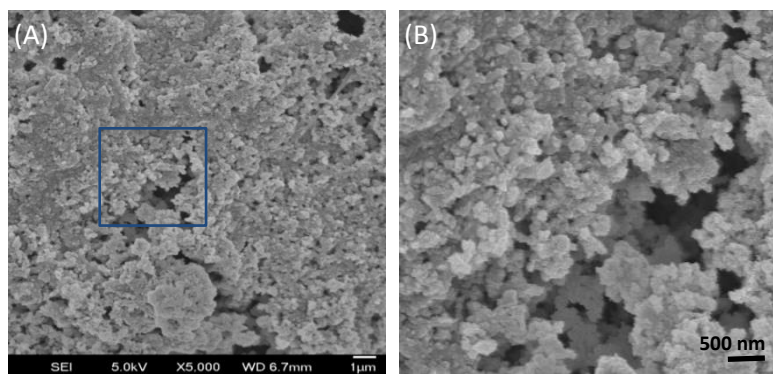

**Fig. S4** (A) SEM image of copper nanoparticles obtained by disproportionation of  $\text{CuCl}$  at 220 °C for 30 min followed by further heat treatment at 300 °C for 20 min. (B) Enlarged region of the blue box in (A).

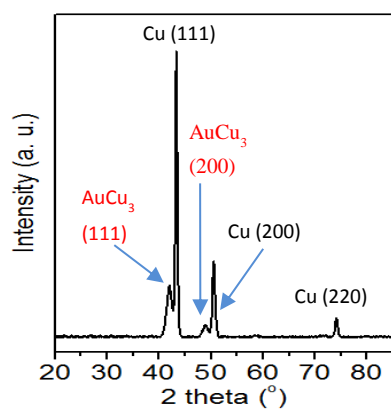

**Fig. S5** (A) XRD pattern of the Cu/Au nanostructures (220/220 °C) after annealing in vacuum at 220 °C.

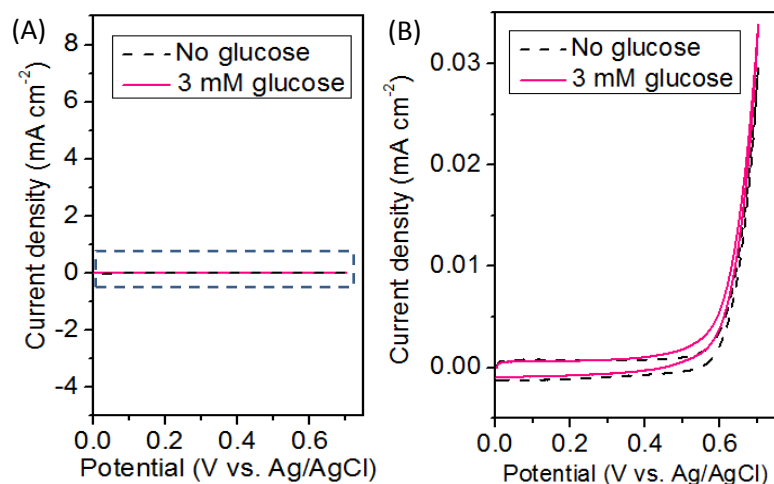

**Fig. S6** (A) CV profiles of FTO substrates as electrodes at a potential window of 0-0.7 V (vs. Ag/AgCl) and a scan rate of  $50 \text{ mV s}^{-1}$  without (black line) and with (red line) 3 mM glucose. (B) Enlarged region of the dotted blue box in (A).

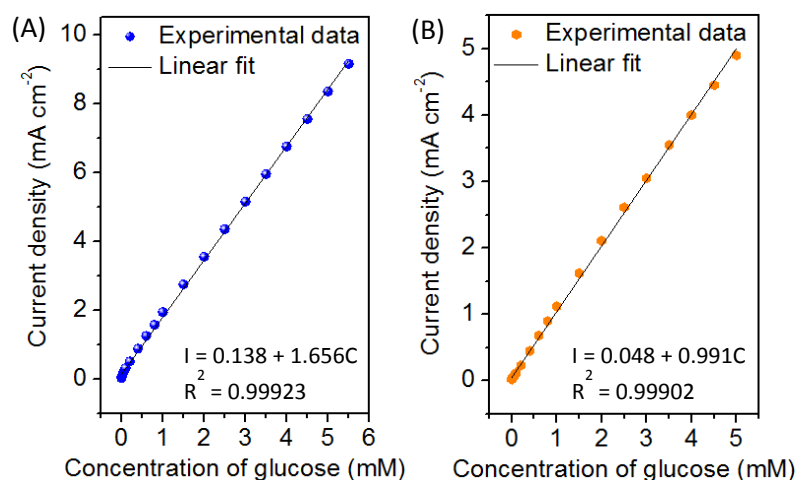

**Fig. S7** Linear range of (A) Cu/Au nanotubes at 3 mol% Au (220/140 °C) and (B) Cu/Au porous nanowires at 1 mol% Au as glucose sensors at an applied potential of 0.6 V.

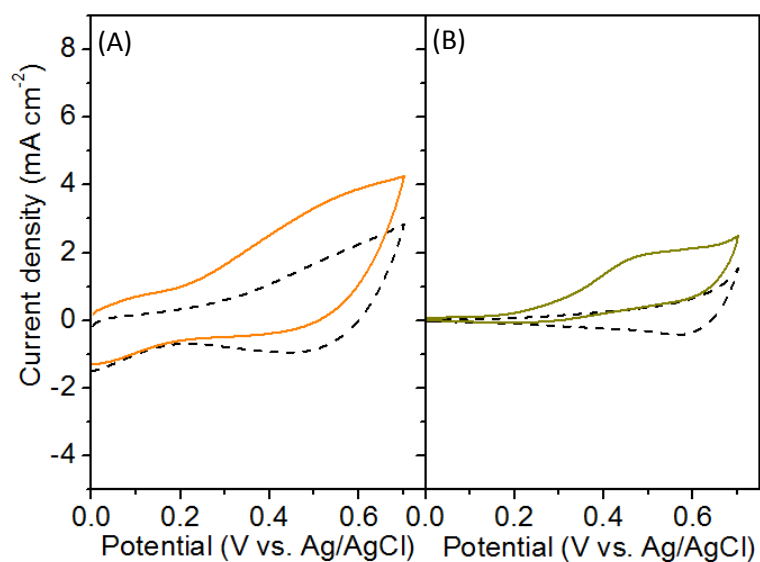

**Fig. S8** CV profiles of different composition gold-incorporated copper nanowires on FTO substrates as electrodes at a potential window of 0-0.7 V (vs. Ag/AgCl) and a scan rate of 50 mV s<sup>-1</sup> without (--- dash line) and with (— solid line) 3.0 mM of glucose. (A) Molar ratio of Au/CuCl at 1:100 (*i.e.* 1 mol% Au) and (B) molar ratio of Au/CuCl at 1:1000 (*i.e.* 0.1 mol% Au).
